# Supplementary material for: Seasonal differences in formation processes of oxidized organic aerosol near Houston, TX
Source: Copernicus journal article supplement (doi:10.5194/acp-2018-1269), 2018-12-12
Supplement: Supplementary file 1 [file acp-2018-1269-supplement.pdf]

## *Supplemental Information for*

### **Seasonal differences in formation processes of oxidized organic aerosol near Houston, TX**

Qili Dai<sup>1, 2</sup>, Benjamin C. Schulze<sup>2, 3</sup>, Xiaohui Bi<sup>1, 2</sup>, Alexander A.T. Bui<sup>2</sup>, Fangzhou Guo<sup>2</sup>, Henry W. Wallace<sup>2, 4</sup>, Nancy P. Sanchez<sup>2</sup>, James H. Flynn<sup>5</sup>, Barry L. Lefer<sup>5, 6</sup>, Yinchang Feng<sup>1\*</sup>, Robert J. Griffin<sup>2, 7</sup>

7

<sup>1</sup>State Environmental Protection Key Laboratory of Urban Ambient Air Particulate Matter Pollution Prevention and Control, College of Environmental Science and Engineering, Nankai University, Tianjin 300350, China

<sup>2</sup>Department of Civil and Environmental Engineering, Rice University, Houston, TX, 77005

<sup>3</sup>Department of Environmental Science and Engineering, California Institute of Technology, Pasaedna, CA, 91125

<sup>4</sup>Washington State Department of Ecology, Lacey WA, 98503

<sup>5</sup>Department of Earth and Atmospheric Sciences, University of Houston, Houston, TX, 77004

<sup>6</sup>Division of Tropospheric Composition, NASA, Washington, DC 20024

<sup>7</sup>Department of Chemical and Biomolecular Engineering, Rice University, Houston, TX, 77005

\*Corresponding author: Yinchang Feng ([fengyc@nankai.edu.cn](mailto:fengyc@nankai.edu.cn))

1 **1. Location of Measurement Site**

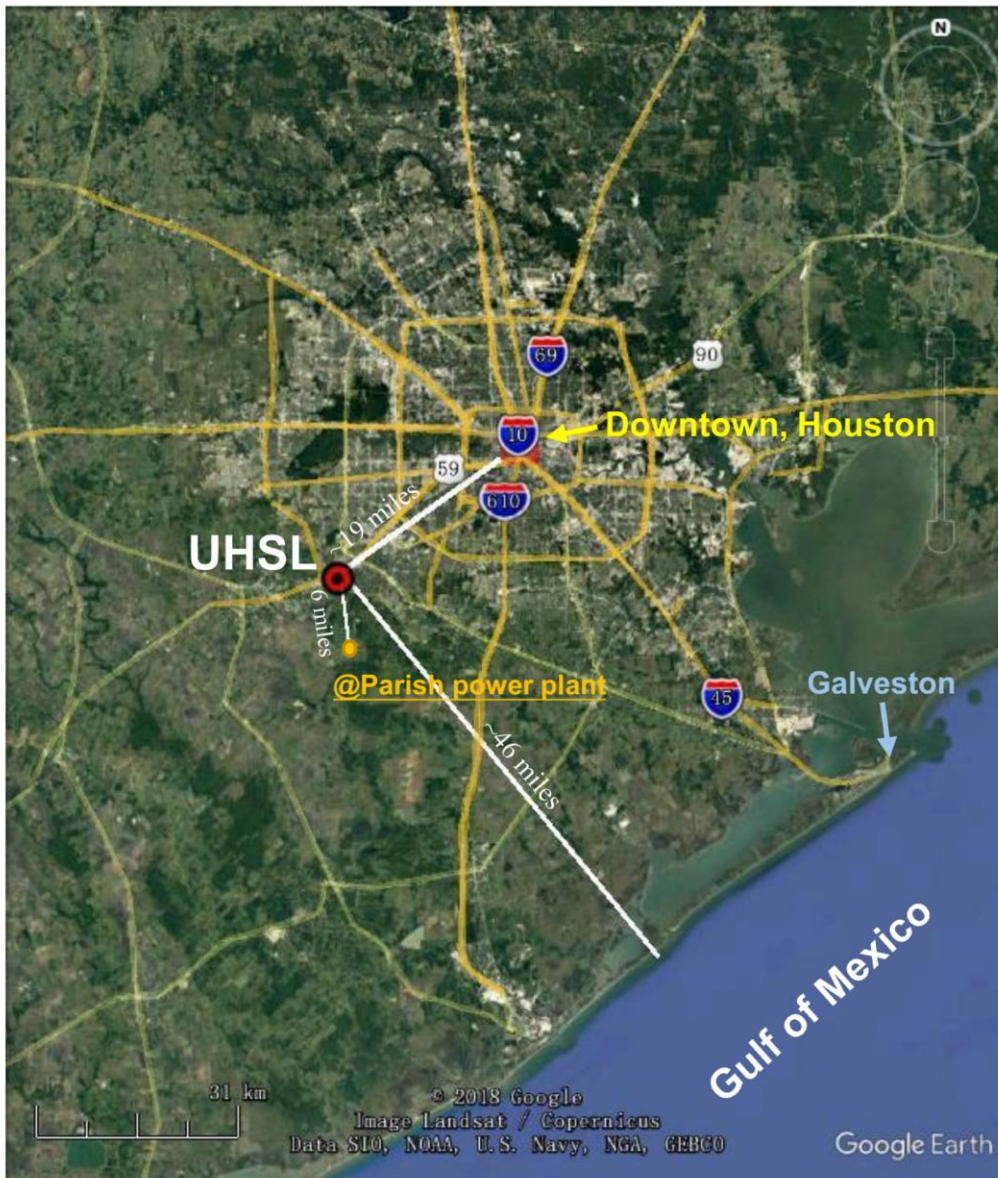

2  
3 **Figure S1.** Google map for the location of the measurement site (University of Houston Sugar  
4 Land, UHSL).

5

6 **2. Detection limits**

7 The detection limits for major NR-PM<sub>1</sub> species measured during the two campaigns were  
8 calculated as three times of the standard deviation of filter periods.

9 **Table S1.** Detection limits (DL) determined for NR-PM<sub>1</sub> species measured during the winter  
10 and summer campaign.

|        |                      | Org.  | SO <sub>4</sub> | NO <sub>3</sub> | NH <sub>4</sub> | Chl   |
|--------|----------------------|-------|-----------------|-----------------|-----------------|-------|
| Winter | DL                   | 0.106 | 0.008           | 0.008           | 0.001           | 0.008 |
|        | Measurement below DL | 0%    | 0%              | 0%              | 0%              | 5%    |
| Summer | DL                   | 0.120 | 0.012           | 0.016           | 0.011           | 0.011 |
|        | Measurement below DL | 0%    | 0%              | 3%              | 0%              | 50%   |

11

12

13 **3. High organic nitrate mass loading periods**

14 Figure S2 presents the scatter plots of  $\text{NO}_2^+$  versus  $\text{NO}^+$  for winter and summer campaigns.  
 15 The slope for organic nitrate (dashed green lines,  $R_{\text{ON}} = 0.166$ ) was adopted from the literature  
 16 (Fry et al., 2009), the slope for inorganic nitrate (dashed blue line,  $R_{\text{NH}_4\text{NO}_3} = 0.588$ , 0.381 for  
 17 the winter and summer campaigns, respectively) was obtained from our calibrations, and  $R_{\text{obs}}$  is  
 18 the ambient  $\text{NO}_x^+$  ratio. Most of the data observed in winter were far from the organic nitrate  
 19 slope and most of the data observed in summer close to the organic nitrate slope, indicating  
 20 nitrate in winter was nearly all inorganic and nitrate in summer was at least partly organic.

21

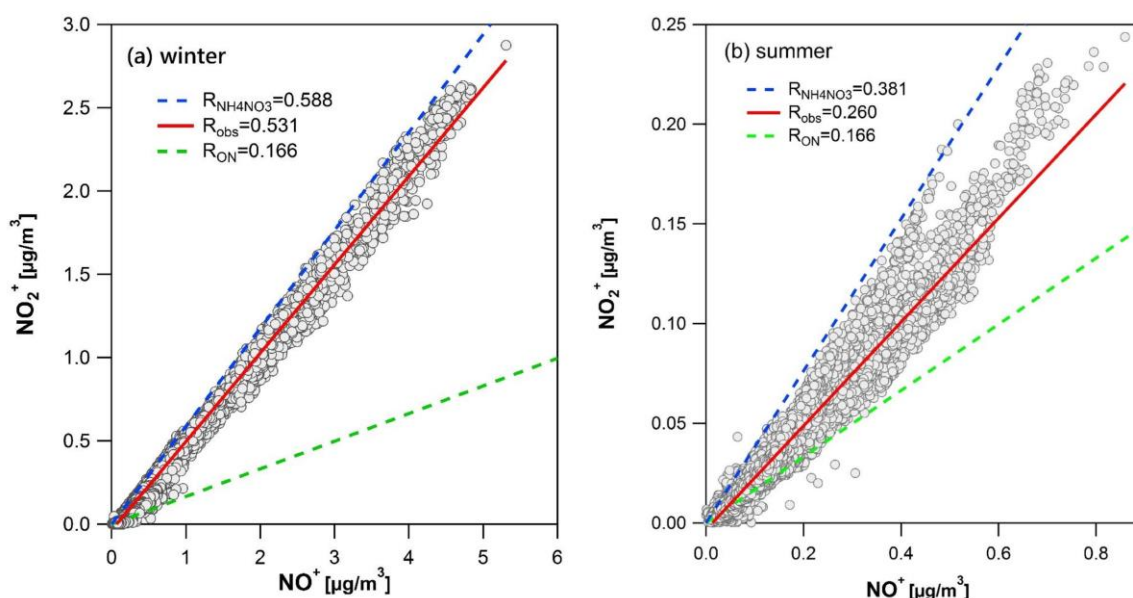

22

23 **Figure S2.** Scatter plots of  $\text{NO}_2^+$  vs  $\text{NO}^+$  for the winter and summer campaigns.

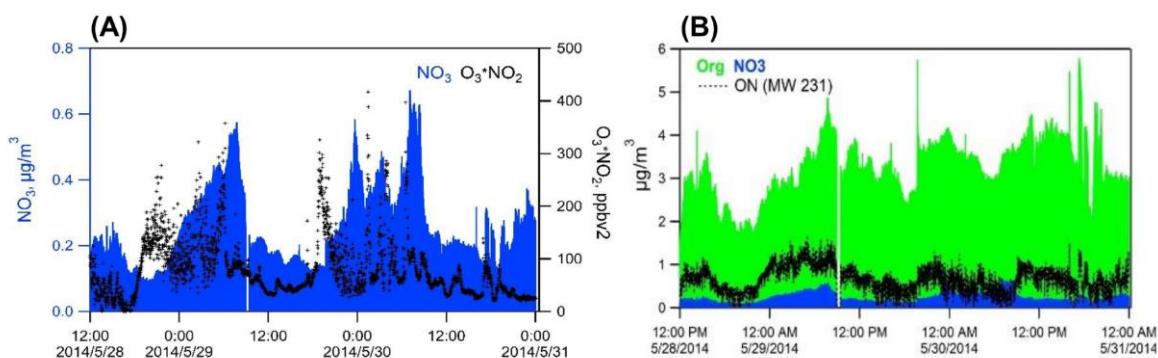

**High ON loading period from May 28<sup>th</sup> to 31<sup>th</sup>**

24

25 **Figure S3.** A high ON loading period observed during the summer campaign: (A) time series  
 26 of the mass loading of  $\text{NO}_3$  and  $\text{O}_3$  times  $\text{NO}_2$ , (B) organics (Org),  $\text{NO}_3$  and estimated ON.

## 27 **4. PMF Analysis**

### 28 **4.1 Selection of PMF factor number**

29 First, a minimum error value was applied to the error matrix, and each ion was evaluated  
30 by its signal-to-noise (SNR) ratio. Mass fragments with an average SNR between 0.2 and 2  
31 were downweighted by increasing their errors by a factor of 2, while those mass fragments with  
32 a  $\text{SNR} < 0.2$  were removed from the dataset. Errors of the ions related to  $\text{CO}_2^+$  (i.e.,  $\text{O}^+$ ,  $\text{HO}^+$ ,  
33  $\text{H}_2\text{O}^+$ ,  $\text{CO}^+$ ) were also downweighted to avoid excessive weighting of the signal at  $m/z$  44. All  
34 isotopes were removed from the matrix given that their signals were scaled to their parent ions.  
35 The PMF2 algorithm running in robust mode with the error model set to 0 was used for PMF  
36 analysis.

37 The PMF solution with factor numbers greater than five and four for the winter and  
38 summer, respectively, yielded no new distinct and physical meaningful factors. The  $Q/Q_{\text{exp}}$  and  
39 the factors obtained for different FPEAK (from -1 to 1 with an increment of 0.2) values  
40 resulted in small differences in the OA components. Because of the lowest  $Q/Q_{\text{exp}}$  and because  
41 the use of FPEAK values different from zero did not improve the correlations between PMF  
42 factors and external tracers, the five- and four-factor solutions with  $\text{FPEAK} = 0$  can be well  
43 interpreted in winter and summer, respectively. The convergence of the PMF model containing  
44 five and four factors were examined by running each model from fifteen different starting  
45 values (SEEDs 0-30 with a step value of 2). The small variation observed in  $Q/Q_{\text{exp}}$  and the  
46 mass fraction of different factors as SEED changed indicates the solutions were stable. As a  
47 result, SEED 0 was chosen for the final solution.

#### 48 **OA in winter**

49 The values of  $Q/Q_{\text{exp}}$  of the PMF solution with more than three factors slightly decreased  
50 when adding a new factor into the model, indicating that the best solution probably contained at  
51 least three factors (Fig. S4). Comparing with the three-factor solution, the reconstructed OA  
52 mass with factor number great than three fitted the measured OA mass very well, and the  
53 six-factor solution had the smallest scaled residuals for ions (Fig. S5). Thus, PMF solutions  
54 containing between four and six factors could explain most of the variance of the winter dataset  
55 (Fig. S6).

56

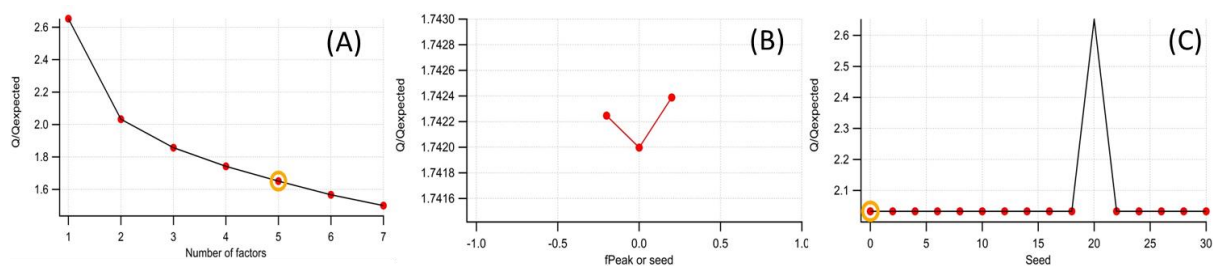

57

58 **Figure S4.**  $Q/Q_{exp}$  for PMF solutions containing between one to seven factors for the winter  
59 dataset (A).  $Q/Q_{exp}$  for the five-factors solution with FPEAK from -1 to 1 (B).  $Q/Q_{exp}$  for the  
60 five-factors solution with SEED from 0-30 (C).

61

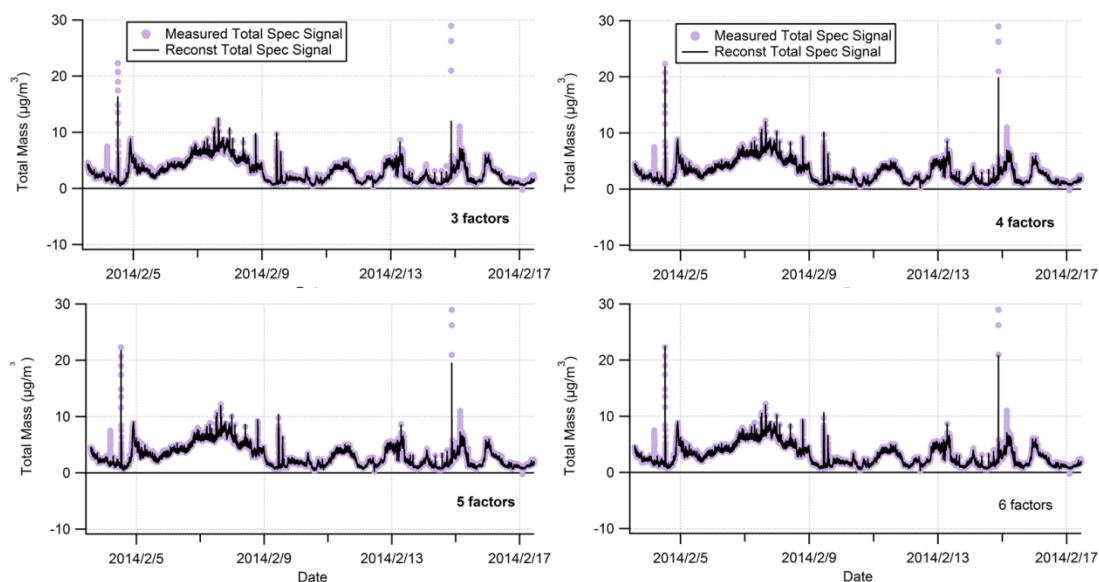

62

63 **Figure S5.** Measured and reconstructed submicron OA mass concentrations by PMF solutions  
64 containing three to six factors for the winter dataset.

65

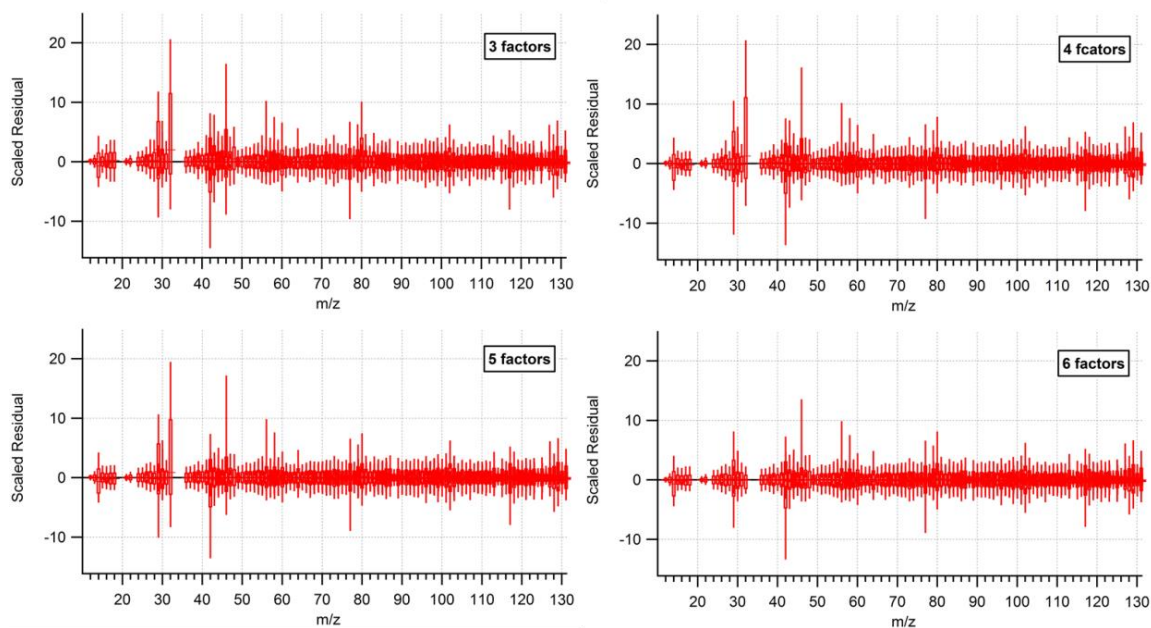

66  
 67 **Figure S6.** Scaled residuals for PMF models including three to six factors for the winter  
 68 dataset.

69  
 70 By comparing the mass spectra of factors in the five-factor solution with that in the six-factor  
 71 solution (Fig. S7), we find that F5 in the five-factor solution was split into F4 and F6 in the  
 72 six-factor solution. As observed in Table S2, F4 in the six-factor solution is an unrealistic factor  
 73 with both high H:C and O:C ratios, which is not physically meaningful.

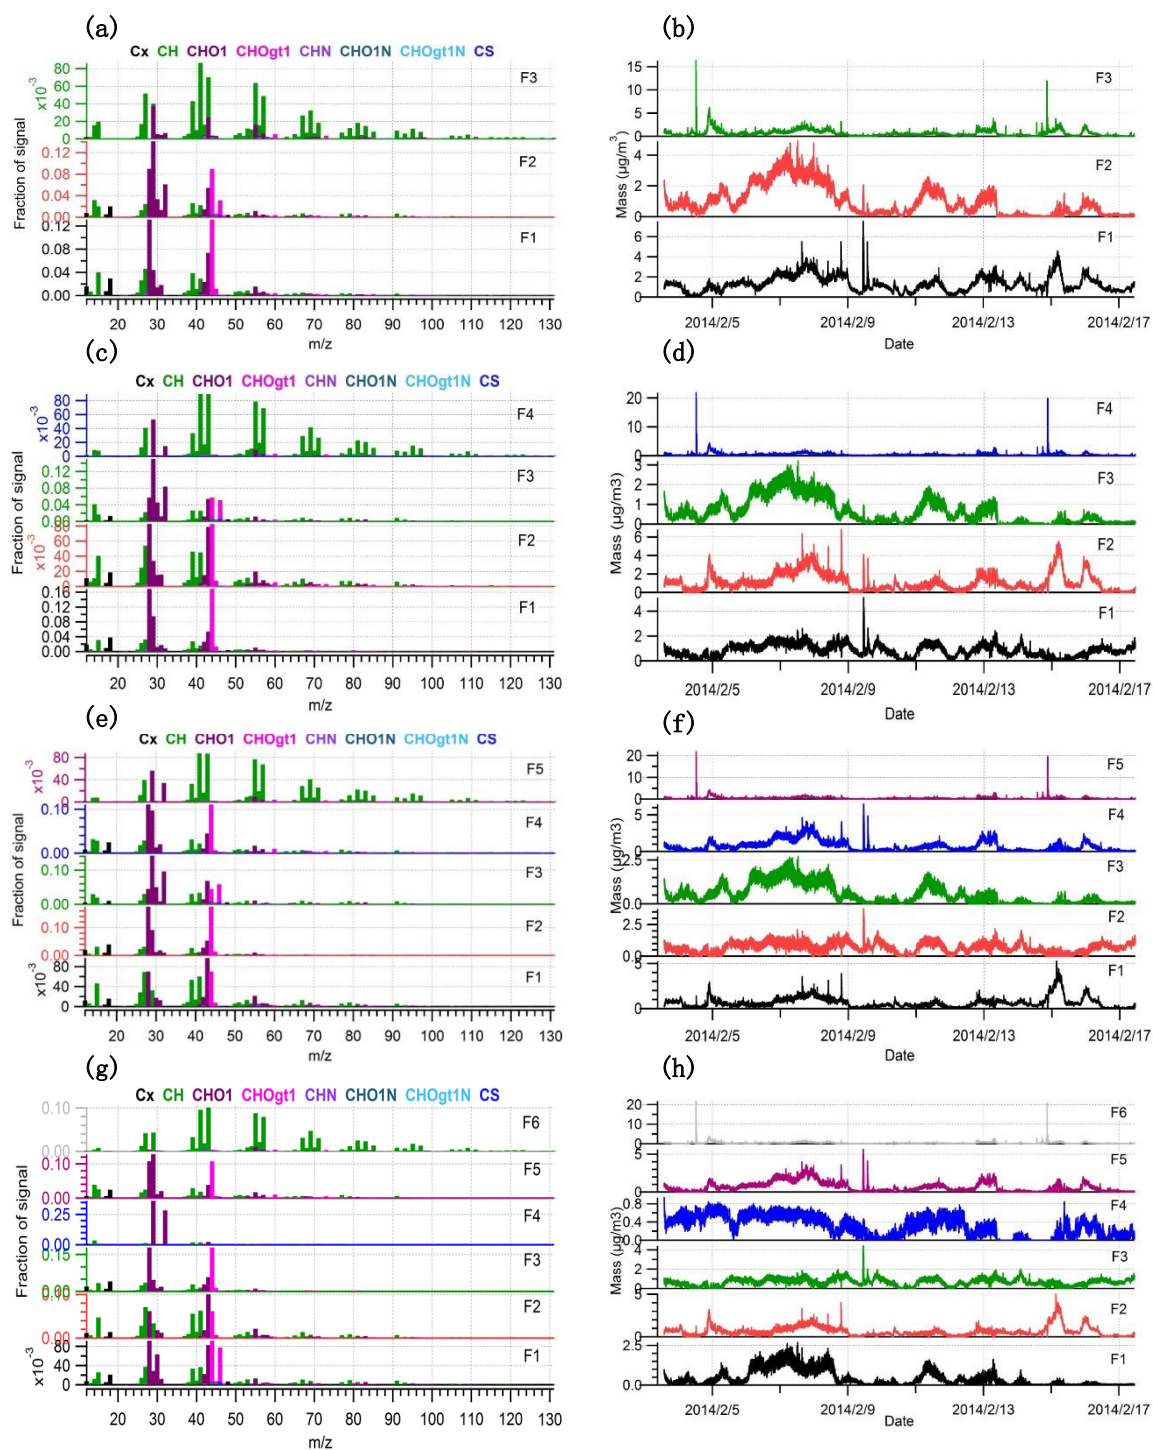

74  
 75 **Figure S7.** Comparison of mass spectra and time series for three- (a, b), four- (c, d), five- (e, f),  
 76 and six- (g, h) factor PMF solutions of the winter dataset.

77  
 78



79 **Table S2.** H:C, O:C and OM:OC ratios of factors resulting from PMF solutions including three  
 80 to six factors (F1 to F6) for the winter dataset.

| Number of<br>factors in<br>PMF solution | H:C/ O:C/ OM:OC       |                       |                       |                       |                       |                |
|-----------------------------------------|-----------------------|-----------------------|-----------------------|-----------------------|-----------------------|----------------|
|                                         | F1                    | F2                    | F3                    | F4                    | F5                    | F6             |
| 3                                       | 1.52/0.72/2.10        | 1.84/0.99/2.49        | 2.03/0.11/1.33        |                       |                       |                |
| 4                                       | 1.45/1.07/2.56        | 1.65/0.49/1.80        | 1.99/0.95/2.45        | 2.15/0.09/1.31        |                       |                |
| <b>5</b>                                | <b>1.68/0.37/1.65</b> | <b>1.41/1.10/2.61</b> | <b>2.06/0.89/2.38</b> | <b>0.61/0.76/2.17</b> | <b>2.17/0.11/1.34</b> |                |
| 6                                       | 1.64/0.71/2.11        | 1.69/0.35/1.61        | 1.37/0.95/2.40        | 2.92/1.52/3.28        | 1.63/0.85/2.28        | 2.06/0.04/1.23 |

81  
 82 As defined in Equation S1, the spectral overlapping fraction (SOF) derived from the  
 83 spectral contrast angle between factors can be used to access the degree of similarity between  
 84 the mass spectra of PMF factors (Wan et al., 2002; Wallace et al., 2018). SOF varies between 0  
 85 and 1 for factors with null and complete mass spectrum overlap, respectively.

$$86 \text{ SOF} = 1 - \frac{SCA}{90} \quad (S1)$$

87 where SCA is the spectral contrast angle between PMF factors (with value of degrees).

88 The six-factor PMF solution exhibits higher resemblance between factors as reflected by  
 89 SOFs values exceeding 0.9 for F1 and F2, as well as for F5 and F6 (Table S3). These results  
 90 indicated that the optimum number of factors is likely no more than five. The PMF solutions  
 91 with three to five factors have distinct chemical character as reflected by varying oxidation  
 92 metrics and spectral overlapping fractions not exceeding 0.9. Although the SOF value for F1  
 93 and F3 in the five-factor solution is as high as 0.9, the oxidation states of F1 and F3 are  
 94 obviously different. Because the scaled residual for ions in the five-factor solution gets smaller  
 95 than those in the four-factor solution, the five-factor solution is selected as the optimum  
 96 solution for the winter dataset.

97

98 **Table S3** Spectral overlapping fraction (SOF) between factors in PMF solutions containing  
 99 three to six factors (F1 to F6) for the winter dataset.

|    | F1   | F2   | F3   | F4   | F5 | F6 | Number of factors in<br>PMF solution |
|----|------|------|------|------|----|----|--------------------------------------|
| F1 | 1    |      |      |      |    |    |                                      |
| F2 | 0.58 | 1    |      |      |    |    |                                      |
| F3 | 0.82 | 0.68 | 1    |      |    |    | 4                                    |
| F4 | 0.43 | 0.82 | 0.54 | 1    |    |    |                                      |
| F1 | 1    |      |      |      |    |    |                                      |
| F2 | 0.30 | 1    |      |      |    |    |                                      |
| F3 | 0.90 | 0.33 | 1    |      |    |    | 5                                    |
| F4 | 0.78 | 0.26 | 0.70 | 1    |    |    |                                      |
| F5 | 0.45 | 0.46 | 0.47 | 0.35 | 1  |    |                                      |
| F1 | 1    |      |      |      |    |    |                                      |
| F2 | 1    | 1    |      |      |    |    |                                      |
| F3 | 0.73 | 0.73 | 1    |      |    |    | 6                                    |
| F4 | 0.66 | 0.66 | 0.76 | 1    |    |    |                                      |
| F5 | 0.76 | 0.76 | 0.78 | 0.73 | 1  |    |                                      |
| F6 | 0.73 | 0.73 | 0.76 | 0.70 | 1  | 1  |                                      |

100

101 **OA in summer**

102 The value of  $Q/Q_{\text{exp}}$  consistently decreased when additional factors were added in the  
 103 model. As shown in Fig. S8, after the four-factor solution, the incorporation of additional  
 104 factors caused smaller decreases in  $Q/Q_{\text{exp}}$ , indicating that a four-factor solution could explain  
 105 the variance of summer submicron OA. This is supported by Figs. S9 and S10, which indicate  
 106 measured and reconstructed OA time series and the scaled residuals for each solution,  
 107 respectively.

108

109

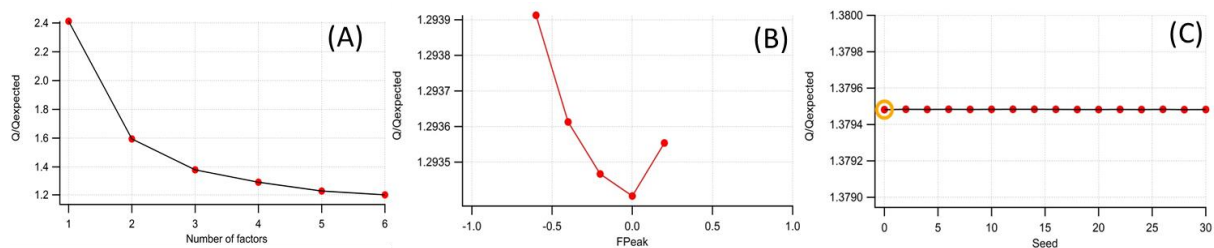

110

111 **Figure S8.**  $Q/Q_{exp}$  for PMF solutions containing one to five factors for the summer dataset (A).

112  $Q/Q_{exp}$  for the four-factors solution with FPEAK from -1 to 1 (B).  $Q/Q_{exp}$  for the four-factors

113 solution with SEED from 0-30 (C).

114

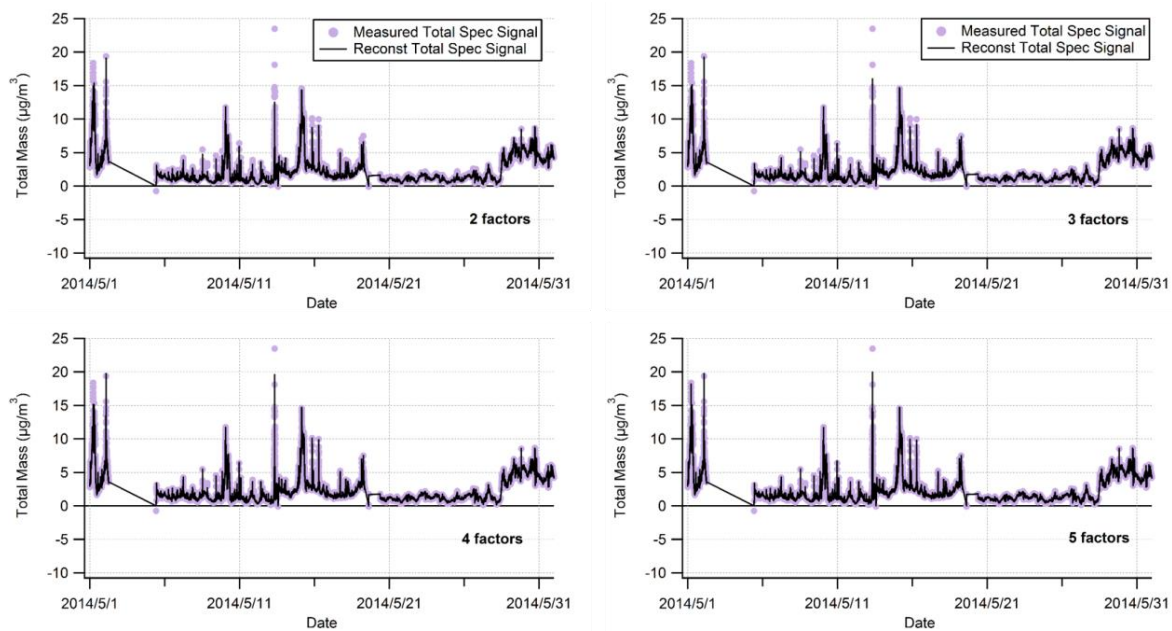

115

116 **Figure S9.** Measured and reconstructed submicron OA mass concentrations by PMF solutions

117 containing two to five factors for the summer dataset.

118

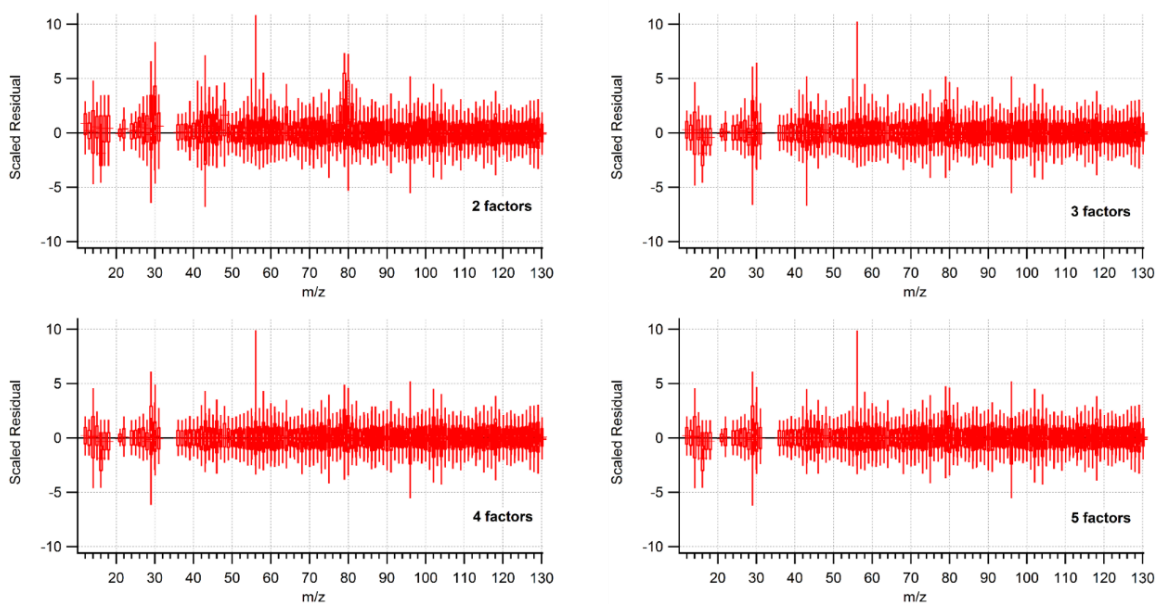

119  
 120 **Figure S10.** Scaled residuals for PMF models including two to five factors for the summer  
 121 dataset.

122  
 123 The PMF factors associated with a five-factor solution were interpreted potentially as three  
 124 POA (HOA, BBOA and COA) and two OOA (LO-OOA and MO-OOA) factors. Our spectral  
 125 results (Fig. S11) show that F4 in the four-factor solution was split into F2 and F5 in the  
 126 five-factor solution. In this case, F2 is unrealistic because the O/C ratio of F2 is lower than that  
 127 of HOA (Table S4). In addition, there is no  $C_3H_3O^+$  signal at  $m/z$  55 in the mass spectra of F2,  
 128 and the diel plot of F2 does not show a routine peak during local mealtime. Thus, it is unlikely  
 129 to be related to cooking activities. Thus, we believe that the four-factor solution is the optimum  
 130 solution for the summer dataset.

131

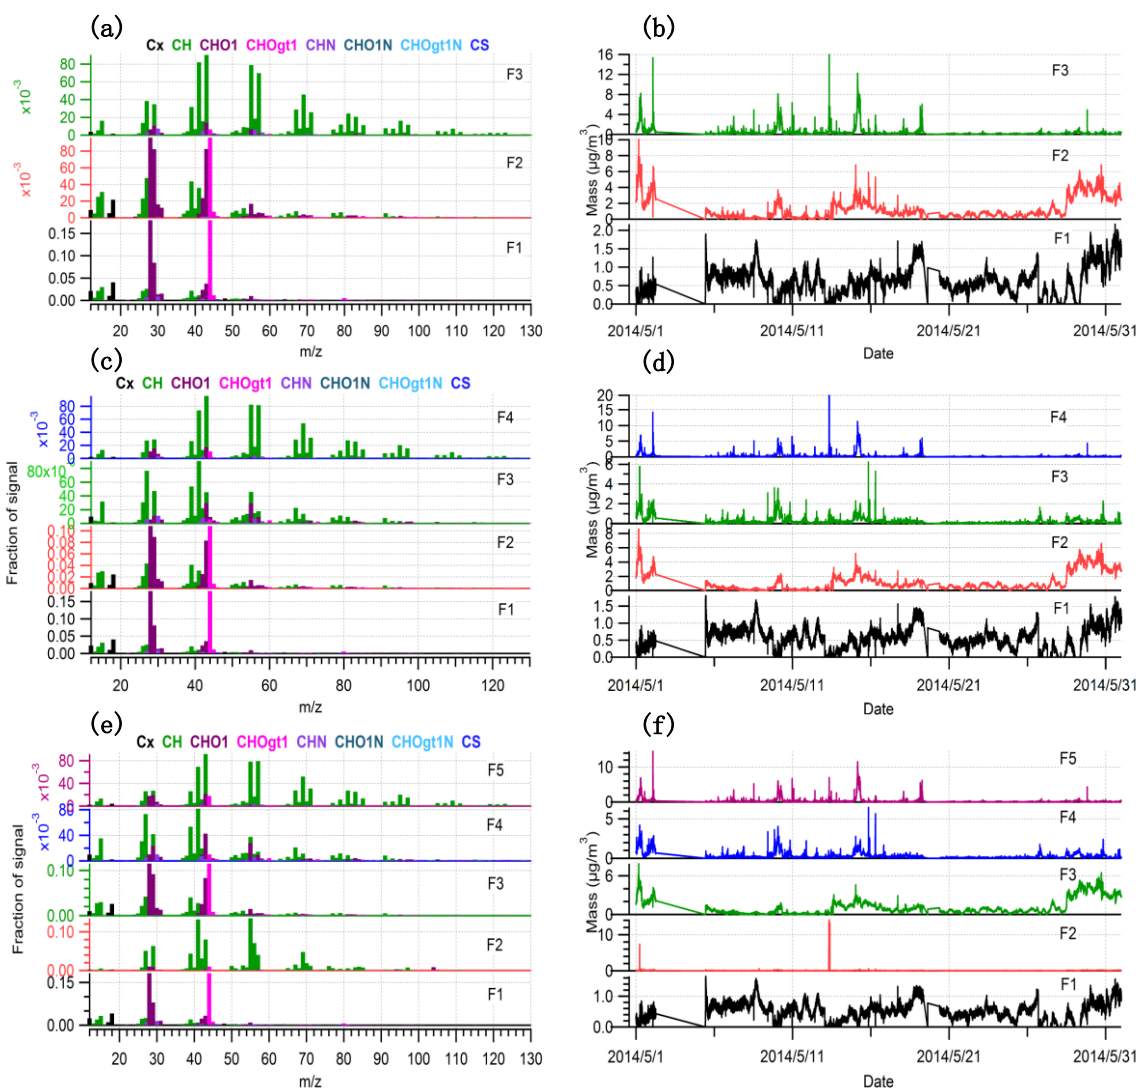

132  
 133 **Figure S11.** Comparison of mass spectra and time series for three- (a, b), four- (c, d) and five-  
 134 (e, f) factor PMF solutions of the summer dataset.

135  
 136 **Table S4.** H:C, O:C and OM:OC ratios of factors resulting from PMF solutions including three  
 137 to five factors (F1 to F5) for the summer dataset.

| Number of factors in PMF solution | H:C/ O:C/OM:OC        |                       |                       |                       |                |
|-----------------------------------|-----------------------|-----------------------|-----------------------|-----------------------|----------------|
|                                   | F1                    | F2                    | F3                    | F4                    | F5             |
| 3                                 | 1.43/1.08/            | 1.66/0.66/            | 2.06/0.07/            |                       |                |
| 4                                 | <b>1.43/1.07/2.59</b> | <b>1.63/0.74/2.12</b> | <b>1.86/0.13/1.35</b> | <b>2.09/0.07/1.28</b> |                |
| 5                                 | 1.42/1.08/2.61        | 2.03/0.05/1.24        | 1.61/0.78/2.18        | 1.85/0.17/1.41        | 2.08/0.10/1.32 |

138  
 139 **4.2 Factor interpretation**

140 The identified factors of OA in the winter included three POA factors (a hydrocarbon-like

141 OA (HOA), a biomass burning OA (BBOA), and a cooking-related OA (COA)), and two  
142 presumed SOA factors divided according to their O/C ratios (a more oxidized oxygenated OA  
143 (MO-OOA) and a less oxidized oxygenated OA (LO-OOA)). However, we were unable to  
144 identify a COA factor for the summer dataset.

145

### 146 **Hydrocarbon-like OA (HOA)**

147 As a common factor of OA, HOA has been identified in both winter and summer  
148 campaigns. The mass spectra of HOA is characterized by the presence of alkyl fragments, with  
149 strong signal of non-oxygenated species at  $m/z$  43 ( $C_3H_7^+$ ),  $m/z$  55 ( $C_4H_7^+$ ),  $m/z$  56 ( $C_4H_8^+$ ) and  
150  $m/z$  57 ( $C_4H_9^+$ ) (main text, Fig. 7), which is generated during fossil fuel combustion (Lanz et al.,  
151 2008; Morgan et al., 2010; Ng et al., 2010; Wallace et al., 2018). Strong correlations were  
152 found between the time series of HOA and the  $C_nH_{2n+1}^+$  and  $C_nH_{2n-1}^+$  ions, e.g.,  $C_3H_7^+$  ( $r = 0.93$   
153 and  $0.97$  for the winter and summer dataset, respectively),  $C_4H_7^+$  ( $r = 0.93$  and  $0.96$ ),  $C_4H_8^+$  ( $r =$   
154  $0.94$  and  $0.92$ ) and  $C_4H_9^+$  ( $r = 0.90$  and  $0.99$ ). The high fractions of alkyl fragments resulted in  
155 the highest H/C ratio (2.17 and 2.09 for the winter and summer) and lowest O/C ratio (0.11 and  
156 0.07) of HOA compared to other factors. Additionally, both HOA factors in the summer and  
157 winter correlated very well with primary combustion derived trace gas species such as CO and  
158 NO (main text, Fig. 5). The HOA diurnal profiles show peaks during morning rush-hours (at  
159 6-7:00 and 7-8:00 local time in summer and winter). Because Interstate Highway 69, with high  
160 traffic flow, is located very close to the measurement site, it is expected that traffic-related  
161 pollutants emitted from vehicle fleets would contribute to OA in both winter and summer. The  
162 decrease of HOA in the afternoon likely was due to the dilution effect of a rising PBL (Kim et  
163 al., 2017). The HOA increased from late afternoon (15:00-16:00) until the next morning,  
164 suggesting that the shallow PBL enriched air pollutants from traffic emissions. The diurnal  
165 pattern of HOA in the winter (Fig. 4, main text) was characterized with a peak during evening  
166 rush hour, indicating the enhanced association of HOA with vehicle emissions.

167

### 168 **Biomass burning OA (BBOA)**

169 The BBOA factor was identified using factor-tracer correlation. The commonly used tracer  
170 of biomass burning is levoglucosan ( $C_6H_{10}O_5$ ), which has significant signal of fragment ions at

171  $C_2H_4O_2^+$  ( $m/z$  60) and  $C_3H_5O_2^+$  ( $m/z$  73) (Cubison et al., 2011). These  $m/z$  ions have been  
172 widely used as tracers for BBOA in AMS datasets (Cubison et al., 2011; Zhang et al., 2011;  
173 Kim et al., 2017; Wallace et al., 2018). The ion signal of  $C_2H_4O_2^+$  in mass spectra of BBOA is  
174 higher than that in HOA and COA for our dataset (main text, Fig. 7). Fig. 5 (main text) presents  
175 strong correlations between BBOA and  $C_2H_4O_2^+$ , with Pearson's  $r$  of 0.96 and 0.68 for the  
176 winter and summer dataset, respectively.

177 The mass spectra of BBOA was characterized by strong correlation with alkyl fragments  
178 ( $C_nH_{2n+1}^+$  and  $C_nH_{2n-1}^+$ :  $C_4H_8^+$   $r = 0.66$  and  $0.77$  for winter and summer, respectively) and with  
179 oxygenated ions ( $C_xH_yO^+$  and  $C_xH_yO_2^+$ :  $C_6H_{10}O^+$   $r=0.75$  and  $0.96$  for winter and summer  
180 dataset, respectively). Sources of BBOA include wood combustion for cooking and heating,  
181 waste disposal, and wildfires. BBOA corresponds to local emissions under relatively low wind  
182 speed or regional transport under relatively high wind speed. This finding is consistent with a  
183 previous study conducted in another site in Houston (Wallace et al., 2018). BBOA can  
184 gradually age during transport, leading to a broad range of O/C. The O/C ratio of BBOA is  
185 higher than that in HOA and lower than that in both OOA factors in both seasons, but the O/C  
186 of BBOA in winter (0.76) is several times of that in summer (0.13), likely indicating that  
187 BBOA in winter is from different sources and/or processed to some extent. The diurnal pattern  
188 of BBOA (Fig. 4, main text) shows overnight increases in winter, with peaks at mealtime in the  
189 morning and evening in summer. A possible reason for this difference is that wood burning  
190 during winter was used not only for cooking but also for heating, especially in the more rural  
191 northern areas of Houston, from which PM was transported. BBOA was the most abundant OA  
192 in Houston during the winter campaign, revealing the important role of residential activities in  
193 OA enhancement.

194

### 195 **Cooking OA (COA)**

196 COA was responsible for 22% of OA mass in winter, which is higher than HOA. However,  
197 COA was not identified during the summer campaign. The mass spectrum of COA is similar to  
198 that of HOA but exhibits more oxidized features. The O/C ratio for COA is 0.37, which is  
199 larger than that for HOA by a factor of three. Previous studies suggest that  $C_3H_3O^+$  could be  
200 used as key tracer of cooking-related aerosols, as it is likely the fragment of oxygenated fatty

201 acids in cooking oils and animal fat (He et al., 2010; Mohr et al., 2012). The abundance of  
202  $C_3H_3O^+$  ions in  $m/z$  55 in COA was higher than that in other factors (main text, Fig. 7).  
203 Moderate correlation ( $r= 0.65$ ) between the time series of COA and  $C_3H_3O^+$  was found.  
204 Additionally, the signals for  $m/z$  55 to  $m/z$  57 for COA are higher than for HOA and BBOA,  
205 which provides insight into the difference in mass spectra between COA and other POA (Zhang  
206 et al., 2011; Mohr et al., 2012). No routine peak was found during mealtimes in the diurnal  
207 pattern of COA (Fig. 4, main text).

208

### 209 **Less-Oxygenated OOA (LO-OOA)**

210 As a ubiquitous factor of OA, LO-OOA was identified for the two campaigns in our study.  
211 The mass spectra of LO-OOA contains less oxidized fragments as compared to MO-OOA  
212 (main text, Fig. 7). LO-OOA correlated well with  $CHO_{gt1}$  fragments in both seasons. As a  
213 proxy for fresh SOA, LO-OOA featured a low  $f_{44}$  compared to MO-OOA. The O/C ratios for  
214 LO-OOA in the winter and summer are 0.89 and 0.74, respectively, which are lower than that  
215 for MO-OOA, but higher than that for BBOA and COA. The strong correlation between  
216 LO-OOA and  $NO_3^-$  ( $r = 0.75$  and  $0.64$  for winter and summer data) further confirmed its  
217 secondary nature. In addition, LO-OOA was correlated very well with ON in the summer, with  
218 Pearson's correlation coefficient of 0.73 (main text, Fig. 5). These results together confirmed  
219 the fresher nature of LO-OOA. LO-OOA accounted for 18% and 53% of OA mass in the winter  
220 and summer, respectively.

221

### 222 **More-Oxygenated OOA (MO-OOA)**

223 MO-OOA has a higher O:C ratio than LO-OOA. The mass spectrum of MO-OOA is  
224 comprised of the  $CHO^+$  and  $CHO_{gt1}$  families. Fig. 5 (main text) shows strong covariance  
225 between MO-OOA and  $CO_2^+$ . In addition, MO-OOA is moderately correlated with  $O_3$  and  $SO_4^{2-}$ ,  
226 which confirms the identity of this factor. Both LO-OOA and MO-OOA have been observed in  
227 the winter and summer, indicating OOA is a ubiquitous component of OA, as reported in the  
228 literature (Ng et al., 2010). MO-OOA appears to have a notable association with regional  
229 transport as its high concentrations occurred with relatively high wind speed.

230



231 **5. Effects of Photochemistry and Aqueous-phase Processing on SOA Formation**

232 Tables S5-S8 present results of the Dunn-Bonferroni *post hoc* test for bin pairwise  
 233 comparisons. The data associated with the artificially created bins in both seasons did not pass  
 234 the normal test and homogeneity test of variances. The Kruskal-Wallis ANOVA for winter and  
 235 summer data of the bins were significant. Thus, the Dunn-Bonferroni test was performed for  
 236 the *post-hoc* pairwise comparisons. The difference between measured variables in different bins  
 237 were significant if the  $p' \leq 0.05$ .

238  
 239 **Table S5.** Result of the Dunn-Bonferroni *post hoc* test for the pairwise comparisons of  
 240 variables in different LWC bins measured in the winter campaign. Values ( $p'$ ) denote adjusted  
 241 significance:  $p' = p/n = p/15$ .

|        | LWC<br>( $\mu\text{g m}^{-3}$ ) | 0-5      | 5-10     | 10-15     | 15-20     | 20-30    |
|--------|---------------------------------|----------|----------|-----------|-----------|----------|
| RH     | 20-40                           | <2E-16   |          |           |           |          |
|        | 40-60                           | <2E-16   | 5.80E-02 |           |           |          |
|        | 60-80                           | <2E-16   | 4.53E-11 | 1.07E-06  |           |          |
|        | 80-100                          | <2E-16   | 7.33E-08 | 1.33E-05  | 6.56E-02  |          |
|        | 100-120                         | <2E-16   | 6.00E-15 | 3.93E-11  | 9.89E-03  | 5.03E-02 |
| WS     | 20-40                           | 3.67E-15 |          |           |           |          |
|        | 40-60                           | 4.20E-15 | 2.23E-02 |           |           |          |
|        | 60-80                           | 8.67E-14 | 6.67E-02 | -4.62E-02 |           |          |
|        | 80-100                          | 7.33E-11 | 3.68E-02 | 6.66E-02  | -4.93E-02 |          |
|        | 100-120                         | 3.60E-15 | 3.60E-06 | 3.17E-03  | 7.33E-05  | 2.47E-02 |
| LO-OOA | 20-40                           | <2E-16   |          |           |           |          |
|        | 40-60                           | 3.33E-15 | 9.10E-03 |           |           |          |
|        | 60-80                           | 6.07E-05 | 2.00E-10 | 2.95E-04  |           |          |
|        | 80-100                          | 6.37E-02 | 8.00E-10 | 2.13E-05  | 4.37E-02  |          |
|        | 100-120                         | 5.73E-02 | 2.60E-15 | 4.33E-11  | 4.94E-04  | 4.73E-02 |
| MO-OOA | 20-40                           | 3.09E-04 |          |           |           |          |
|        | 40-60                           | 4.13E-04 | 6.52E-02 |           |           |          |
|        | 60-80                           | 8.00E-06 | 3.09E-02 | 6.14E-02  |           |          |
|        | 80-100                          | 9.33E-06 | 5.13E-03 | 2.02E-02  | 5.26E-02  |          |
|        | 100-120                         | 2.27E-12 | 1.73E-06 | 9.60E-05  | 2.53E-03  | 5.52E-02 |

242  
 243

244 **Table S6.** Result of the Dunn-Bonferroni *post hoc* test for the pairwise comparisons of  
 245 variables in different LWC bins measured in the summer campaign. Values ( $p'$ ) denote adjusted  
 246 significance:  $p' = p/n = p/15$ .

|        | LWC<br>( $\mu\text{g m}^{-3}$ ) | 0-10     | 10-20     | 20-30    | 30-40    | 40-50    |
|--------|---------------------------------|----------|-----------|----------|----------|----------|
| RH     | 10-20                           | <2E-16   |           |          |          |          |
|        | 20-30                           | <2E-16   | 1.79E-02  |          |          |          |
|        | 30-40                           | <2E-16   | 6.44E-02  | 6.43E-02 |          |          |
|        | 40-50                           | <2E-16   | 6.87E-03  | 6.33E-02 | 4.45E-02 |          |
|        | 50-60                           | <2E-16   | 9.33E-11  | 9.20E-05 | 2.20E-05 | 1.09E-02 |
| WS     | 10-20                           | <2E-16   |           |          |          |          |
|        | 20-30                           | <2E-16   | -3.87E-04 |          |          |          |
|        | 30-40                           | <2E-16   | 1.97E-03  | 6.67E-02 |          |          |
|        | 40-50                           | <2E-16   | 4.46E-03  | 6.67E-02 | 6.67E-02 |          |
|        | 50-60                           | <2E-16   | 1.13E-04  | 6.59E-02 | 6.65E-02 | 6.66E-02 |
| LO-OOA | 10-20                           | <2E-16   |           |          |          |          |
|        | 20-30                           | <2E-16   | 1.67E-07  |          |          |          |
|        | 30-40                           | <2E-16   | 6.67E-14  | 4.54E-03 |          |          |
|        | 40-50                           | <2E-16   | 3.67E-15  | 3.27E-05 | 4.48E-02 |          |
|        | 50-60                           | <2E-16   | 3.60E-15  | 4.47E-07 | 2.51E-02 | 6.67E-02 |
| MO-OOA | 10-20                           | 5.61E-02 |           |          |          |          |
|        | 20-30                           | 2.53E-05 | 1.27E-05  |          |          |          |
|        | 30-40                           | 6.67E-02 | 6.65E-02  | 4.60E-03 |          |          |
|        | 40-50                           | 1.80E-12 | 1.27E-12  | 5.17E-04 | 5.67E-08 |          |
|        | 50-60                           | <2E-16   | <2E-16    | 3.47E-11 | 3.93E-15 | 1.48E-02 |

247

248

249 **Table S7.** Result of the Dunn-Bonferroni *post hoc* test for the pairwise comparisons of  
 250 variables in different O<sub>x</sub> bins measured in the winter campaign. Values (*p*′) denote adjusted  
 251 significance:  $p' = p/n = p/15$ .

|            | O <sub>x</sub> (ppb) | 0-10     | 10-20    | 20-30    | 30-40    | 40-50    |
|------------|----------------------|----------|----------|----------|----------|----------|
| RH         | 10-20                | 1.93E-11 |          |          |          |          |
|            | 20-30                | 1.27E-12 | 6.66E-02 |          |          |          |
|            | 30-40                | 3.73E-04 | 5.07E-15 | <2E-16   |          |          |
|            | 40-50                | 3.44E-02 | <2E-16   | <2E-16   | <2E-16   |          |
|            | 50-60                | 6.46E-02 | 3.73E-15 | <2E-16   | 1.20E-12 | 5.34E-02 |
| Radiometer | 10-20                | 1.60E-10 |          |          |          |          |
|            | 20-30                | 1.20E-03 | 5.53E-15 |          |          |          |
|            | 30-40                | 3.27E-10 | 4.97E-02 | <2E-16   |          |          |
|            | 40-50                | 3.07E-15 | 8.00E-09 | <2E-16   | <2E-16   |          |
|            | 50-60                | 4.33E-15 | 1.13E-10 | <2E-16   | 3.33E-15 | 2.80E-03 |
| LO-OOA     | 10-20                | 6.67E-02 |          |          |          |          |
|            | 20-30                | 4.80E-07 | <2E-16   |          |          |          |
|            | 30-40                | 3.53E-08 | <2E-16   | 1.40E-02 |          |          |
|            | 40-50                | 5.73E-02 | 4.13E-02 | <2E-16   | <2E-16   |          |
|            | 50-60                | 2.47E-02 | 8.00E-03 | <2E-16   | <2E-16   | 3.73E-02 |
| MO-OOA     | 10-20                | 6.64E-02 |          |          |          |          |
|            | 20-30                | 4.20E-11 | <2E-16   |          |          |          |
|            | 30-40                | 4.07E-15 | <2E-16   | <2E-16   |          |          |
|            | 40-50                | 7.33E-08 | 3.93E-15 | 1.87E-04 | <2E-16   |          |
|            | 50-60                | 6.53E-14 | 3.80E-15 | 6.67E-04 | 4.68E-03 | 1.07E-06 |

252

253

254 **Table S8.** Result of the Dunn-Bonferroni *post hoc* test for the pairwise comparisons of  
 255 variables in different O<sub>x</sub> bins measured in the summer campaign. Values (*p*' ) denote adjusted  
 256 significance:  $p' = p/n = p/15$ .

|            | O <sub>x</sub> (ppb) | 0-20     | 20-30    | 30-40    | 40-50    | 50-60    |
|------------|----------------------|----------|----------|----------|----------|----------|
| RH         | 20-30                | 5.20E-15 |          |          |          |          |
|            | 30-40                | <2E-16   | <2E-16   |          |          |          |
|            | 40-50                | <2E-16   | <2E-16   | 1.20E-03 |          |          |
|            | 50-60                | <2E-16   | <2E-16   | <2E-16   | 5.07E-15 |          |
|            | 60-70                | <2E-16   | <2E-16   | <2E-16   | <2E-16   | <2E-16   |
| Radiometer | 20-30                | 3.40E-15 |          |          |          |          |
|            | 30-40                | <2E-16   | <2E-16   |          |          |          |
|            | 40-50                | <2E-16   | 1.67E-15 | 2.20E-06 |          |          |
|            | 50-60                | <2E-16   | <2E-16   | 1.47E-03 | 2.53E-13 |          |
|            | 60-70                | <2E-16   | <2E-16   | <2E-16   | <2E-16   | <2E-16   |
| LO-OOA     | 20-30                | 2.20E-04 |          |          |          |          |
|            | 30-40                | 6.66E-03 | 3.67E-15 |          |          |          |
|            | 40-50                | <2E-16   | <2E-16   | <2E-16   |          |          |
|            | 50-60                | <2E-16   | <2E-16   | <2E-16   | 6.62E-02 |          |
|            | 60-70                | <2E-16   | <2E-16   | <2E-16   | 5.33E-07 | 1.20E-08 |
| MO-OOA     | 20-30                | 1.33E-11 |          |          |          |          |
|            | 30-40                | 2.87E-15 | 8.33E-05 |          |          |          |
|            | 40-50                | 4.07E-15 | 7.57E-04 | 6.67E-02 |          |          |
|            | 50-60                | <2E-16   | <2E-16   | <2E-16   | 4.13E-15 |          |
|            | 60-70                | 2.73E-15 | 7.33E-06 | 4.03E-02 | 4.20E-02 | 8.00E-13 |

257

258

## 259 **References**

- 260 Cubison, M. J., Ortega, A. M., Hayes, P. L., Farmer, D. K., Day, D., Lechner, M. J., Brune, W.  
261 H., Apel, E., Diskin, G. S., Fisher, J. A., Fuelberg, H. E., Hecobian, A., Knapp, D. J.,  
262 Mikoviny, T., Riemer, D., Sachse, G. W., Sessions, W., Weber, R. J., Weinheimer, A. J.,  
263 Wisthaler, A., and Jimenez, J. L.: Effects of aging on organic aerosol from open biomass  
264 burning smoke in aircraft and laboratory studies, *Atmos. Chem. Phys.*, 11, 12049-12064,  
265 <https://doi.org/10.5194/acp-11-12049-2011>, 2011.
- 266 Fry, J. L., Kiendler-Scharr, A., Rollins, A. W., Wooldridge, P. J., Brown, S. S., Fuchs, H., Dube,  
267 W., Mensah, A., dal Maso, M., Tillmann, R., Dorn, H. P., Brauers, T., and Cohen, R. C.:  
268 Organic nitrate and secondary organic aerosol yield from NO<sub>3</sub> oxidation of beta-pinene  
269 evaluated using a gas-phase kinetics/aerosol partitioning model, *Atmos. Chem. Phys.*, 9,  
270 1431-1449, <https://doi.org/10.5194/acp-9-1431-2009>, 2009.
- 271 He, L. Y., Lin, Y., Huang, X. F., Guo, S., Xue, L., Su, Q., Hu, M., Luan, S. J., and Zhang, Y. H.:  
272 Characterization of high-resolution aerosol mass spectra of primary organic aerosol  
273 emissions from Chinese cooking and biomass burning, *Atmos. Chem. Phys.*, 10,  
274 11535-11543, <https://doi.org/10.5194/acp-10-11535-2010>, 2010.
- 275 Kim, H., Zhang, Q., Bae, G. N., Kim, J. Y., and Lee, S. B.: Sources and atmospheric processing  
276 of winter aerosols in Seoul, Korea: insights from real-time measurements using a  
277 high-resolution aerosol mass spectrometer, *Atmos. Chem. Phys.*, 17, 2009-2033,  
278 <https://doi.org/10.5194/acp-17-2009-2017>, 2017.
- 279 Lanz, V. A., Alfarra, M. R., Baltensperger, U., Buchmann, B., Hueglin, C., Szidat, S., Wehrli, M.  
280 N., Wacker, L., Weimer, S., Caseiro, A., Puxbaum, H., Prevot, A. S. H.: Source Attribution  
281 of Submicron Organic Aerosols during Wintertime Inversions by Advanced Factor  
282 Analysis of Aerosol Mass Spectra. *Environ. Sci. Tech.*, 42, (1), 214-220,  
283 <https://doi.org/10.1021/es0707207>, 2008.
- 284 Mohr, C., DeCarlo, P. F., Heringa, M. F., Chirico, R., Slowik, J. G., Richter, R., Reche, C.,  
285 Alastuey, A., Querol, X., Seco, R., Peñuelas, J., Jiménez, J. L., Crippa, M., Zimmermann,  
286 R., Baltensperger, U., and Prévôt, A. S. H.: Identification and quantification of organic  
287 aerosol from cooking and other sources in Barcelona using aerosol mass spectrometer data,  
288 *Atmos. Chem. Phys.*, 12, 1649-1665, <https://doi.org/10.5194/acp-12-1649-2012>, 2012.
- 289 Morgan, W. T., Allan, J. D., Bower, K. N., Highwood, E. J., Liu, D., McMeeking, G. R.,  
290 Northway, M. J., Williams, P. I., Krejci, R., and Coe, H.: Airborne measurements of the  
291 spatial distribution of aerosol chemical composition across Europe and evolution of the

292 organic fraction, *Atmos. Chem. Phys.*, 10, 4065-4083,  
293 <https://doi.org/10.5194/acp-10-4065-2010>, 2010.

294 Ng, N. L., Canagaratna, M. R., Zhang, Q., Jimenez, J. L., Tian, J., Ulbrich, I. M., Kroll, J. H.,  
295 Docherty, K. S., Chhabra, P. S., Bahreini, R., Murphy, S. M., Seinfeld, J. H., Hildebrandt,  
296 L., Donahue, N. M., DeCarlo, P. F., Lanz, V. A., Prevot, A. S. H., Dinar, E., Rudich, Y., and  
297 Worsnop, D. R.: Organic aerosol components observed in Northern Hemispheric datasets  
298 from Aerosol Mass Spectrometry, *Atmos. Chem. Phys.*, 10, 4625-4641,  
299 <https://doi.org/10.5194/acp-10-4625-2010>, 2010.

300 Wallace, H. W., Sanchez, N. P., Flynn, J. H., Erickson, M. H., Lefer, B. L., and Griffin, R. J.:  
301 Source apportionment of particulate matter and trace gases near a major refinery near the  
302 Houston Ship Channel, *Atmos. Environ.*, 173, 16-29,  
303 <https://doi.org/10.1016/j.atmosenv.2017.10.049>, 2018.

304 Wan, K. X., Vidavsky, I., and Gross, M. L.: Comparing similar spectra: From similarity index  
305 to spectral contrast angle, *J. Am. Soc. Mass Spectr.*, 13, 85-88,  
306 [http://doi.org/10.1016/S1044-0305\(01\)00327-0](http://doi.org/10.1016/S1044-0305(01)00327-0), 2002.

307 Zhang, Q., Jimenez, J. L., Canagaratna, M. R., Ulbrich, I. M., Ng, N. L., Worsnop, D. R., and  
308 Sun, Y. L.: Understanding atmospheric organic aerosols via factor analysis of aerosol mass  
309 spectrometry: a review, *Anal. Bioanal. Chem.*, 401, 3045-3067,  
310 <https://doi.org/10.1007/s00216-011-5355-y>, 2011.

311
